1           **A core of functional complementary bacteria infects oysters in Pacific Oyster Mortality**  
2                                           **Syndrome**

3  
4  
5  
6  
7

Camille Clerissi<sup>1,2#</sup>, Xing Luo<sup>3#</sup>, Aude Lucasson<sup>1#</sup>, Shogofa Mortaza<sup>3</sup>, Julien de Lorgeril<sup>1,4</sup>, Eve Toulza<sup>1</sup>, Bruno Petton<sup>5</sup>, Jean-Michel Escoubas<sup>1</sup>, Lionel Dégremont<sup>6</sup>, Yannick Gueguen<sup>1,7</sup>, Delphine Destoumieux-Garzón<sup>1</sup>, Annick Jacq<sup>3&</sup> and Guillaume Mitta<sup>1,8&</sup>

8           <sup>1</sup> IHPE, Université de Montpellier, CNRS, Ifremer, Université de Perpignan Via Domitia, Place E. Bataillon, CC080, 34095 Montpellier, France and 58 Avenue Paul Alduy, 66860 Perpignan, France

10          <sup>2</sup> CRIOBE, EPHE, Université PSL, UPVD, CNRS, UAR CRIOBE, 52 Avenue Paul Alduy, 66860 Perpignan Cedex, France

12          <sup>3</sup> Université Paris-Saclay, CEA, CNRS, Institute for Integrative Biology of the Cell (I2BC), 91198, Gif-sur-Yvette, France

14          <sup>4</sup> Ifremer, IRD, Univ Nouvelle-Calédonie, Univ La Réunion, ENTROPIE, F-98800 Nouméa, Nouvelle-Calédonie, France

16          <sup>5</sup> Ifremer, LEMAR UMR 6539, UBO, CNRS, IRD, Ifremer, 11 presqu'île du vivier, 29840 Argenton-en-Landunvez, France

18          <sup>6</sup> Ifremer, SG2M, LGPMM, Avenue du Mus de Loup, 17930 La Tremblade, France

19          <sup>7</sup> MARBEC, Univ Montpellier, CNRS, Ifremer, IRD, Sète, France

20          <sup>8</sup> Ifremer, IRD, ILM, Université de Polynésie Française, UMR EIO, Vairao, French Polynesia

21  
22  
23  
24  
25  
26  
27

#These authors contributed equally: Camille Clerissi, Xing Luo and Aude Lucasson  
& these two last authors contributed equally: Annick Jacq and Guillaume Mitta. Correspondence and requests for materials should be addressed to A.J. (email: annick.jacq@universite-paris-saclay.fr) or to G.M. (email: mitta@univ-perp.fr)

28 **ABSTRACT**

29 **Background:** The Pacific oyster *Crassostrea gigas* is one of the main cultivated invertebrate species  
30 worldwide. Since 2008, oyster juveniles have been confronted with a lethal syndrome known as the  
31 Pacific Oyster Mortality Syndrome (POMS). POMS is a polymicrobial disease initiated by a primary  
32 infection with the *herpesvirus* OsHV-1  $\mu$ Var that creates an oyster immunocompromised state and  
33 evolves towards a secondary fatal bacteremia. In the present article, we describe the implementation of  
34 an unprecedented combination of metabarcoding and metatranscriptomic approaches to show that the  
35 sequence of events in POMS pathogenesis is conserved across infectious environments. We also  
36 identified a core bacterial consortium which, together with OsHV-1  $\mu$ Var, forms the POMS  
37 pathobiota. This bacterial consortium is characterized by high transcriptional activities and  
38 complementary metabolic functions to exploit host's resources. A significant metabolic specificity was  
39 highlighted at the bacterial genus level, suggesting low competition for nutrients between members of  
40 the core bacteria. Lack of metabolic competition might favor complementary colonization of host  
41 tissues and contribute to the conservation of the POMS pathobiota across distinct infectious  
42 environments.

43

## 44 INTRODUCTION

45 Introduced from Asia to a broad range of countries, *Crassostrea gigas* has become one of the world's  
46 main cultivated species. Since 2008, juvenile stages of *C. gigas* have suffered massive mortality  
47 events, especially in France [1]. In subsequent years, this so-called Pacific Oyster Mortality Syndrome  
48 (POMS) has become panzootic [2]. POMS has been observed in all coastal regions of France [3–5]  
49 and numerous other countries worldwide [1,6–10]. Multiple factors contribute to the disease and its  
50 severity including seawater temperature, oyster genetics, oyster age, microbiota and infectious agents  
51 [11–18]. Thus, dramatic POMS mortality events have coincided with the recurrent detection of  
52 *Ostreid herpesvirus* variants in moribund oysters [3–5] as well as bacterial strains of the genus *Vibrio*  
53 [19,20].

54 Recently, integrative molecular approaches have revealed the complex etiology of POMS, which  
55 involves an interaction between the viral and bacterial agents involved in the pathosystem [21,22].  
56 Infection by *Ostreid herpesvirus* type 1  $\mu$ Var (OsHV-1  $\mu$ Var) is the initial step that leads to an  
57 immunocompromised state of oysters. The resulting dysbiosis and bacteremia ultimately result in  
58 oyster death [21]. Several bacterial genera are involved in this secondary infection [21]; among them  
59 *Vibrio* behave as opportunistic pathogens that cause hemocyte lysis [22]. *Vibrio* species are not the  
60 only bacteria that colonize oyster tissues during the secondary bacterial infection. Several bacterial  
61 genera, including *Arcobacter*, *Marinobacterium*, *Marinomonas*, and *Psychrobium* were also found to  
62 massively colonize OsHV-1-infected oysters [21].

63 The polymicrobial nature of POMS was characterized based on observations in a French Brittany  
64 infectious environment [21]. We still ignore whether POMS pathogenesis is conserved in terms of  
65 sequence of events and bacterial partners in other regions affected by the disease. In addition, the  
66 mechanisms underlying the colonizing capacity of the bacterial consortium have not been elucidated.

67 In the present study, we investigated whether POMS pathogenesis is conserved across environments,  
68 and which biological functions are expressed by the bacterial consortium that causes oyster death. We  
69 compared pathogenesis using oyster biparental families that display contrasting phenotypes (resistant  
70 or susceptible to POMS) confronted to two infectious environments (the Atlantic Bay of Brest, and the  
71 Mediterranean Thau Lagoon). We found that the sequence of events is conserved within both  
72 infectious environments: it starts with an intense viral replication in susceptible oysters, followed by a  
73 secondary bacteremia caused by a conserved bacterial consortium that results in oyster death. Using  
74 metabarcoding and metatranscriptomics, we identified in the present work members of the core  
75 pathobiota and characterized their functional response to host environment. We found that each  
76 bacterial genus has a reproducible transcriptional response across infectious environments. In  
77 particular, translation and central metabolism were highly induced. Results indicate that metabolism  
78 might play an important role in tissue colonization, and that metabolic complementarity between  
79 members of the core consortium possibly explains the conservation of this assemblage across  
80 environments.



## 82 **METHODS**

### 83 **Production of biparental oyster families**

84 *C. gigas* families were produced as described in [21,23]. Briefly, oysters were produced at the Ifremer  
85 hatchery in Argenton in March 2015. Three susceptible families (F<sub>11</sub>, F<sub>14</sub>, and F<sub>15</sub>) and three resistant  
86 families (F<sub>21</sub>, F<sub>23</sub>, and F<sub>48</sub>) were used as recipients, and 15 families were used as donors. All families  
87 were maintained under controlled bio-secured conditions to ensure their specific pathogen-free status.  
88 Status was verified by i) the absence of OsHV-1 DNA using qPCR, (see the protocol below) and ii) a  
89 low *Vibrio* load (~10 cfu/g tissue) on selective culture medium (thiosulfate-citrate-bile salts-sucrose  
90 agar) [24]. Oysters remained free of any abnormal mortality throughout larval development, at which  
91 time experimental infections were started.

92

### 93 **Mesocosm experimental infections**

94 The experimental infection protocol consisted of a cohabitation assay between donors (which had been  
95 exposed to pathogens naturally present in the environment) and recipient specific pathogen-free  
96 oysters [18,19]. Details of the experimental infection protocol (*e.g.*, biomass, oyster weight,  
97 experimental duration, and tank volume) were as described in [21,23]. Briefly, donor oysters were  
98 deployed at Logonna Daoulas (lat. 48.335263, long. -4.317922) in French Brittany (Atlantic  
99 environment) and at Thau Lagoon (lat. 43.418736, long. 3.622620) (Mediterranean environment).  
100 Both sites differ by a series of ecological and environmental factors but POMS mortalities occur in  
101 both sites when temperature reaches ~16°C [25]. Oysters were deployed in farming areas during the  
102 infectious period (in July for Atlantic environment and in September for Mediterranean environment,  
103 temperature around 21°C for both sites), and remained in place until the onset of donor mortality (<  
104 1%). Donors were then brought back to the laboratory (in Argenton, French Brittany) and placed in  
105 tanks, each containing recipient oysters from the three resistant and the three susceptible families.  
106 Experimental infections took place in July 2015 and September 2015 for the Atlantic and  
107 Mediterranean exposures, respectively. For each experimental infection, mortality rate was monitored,  
108 and 10 oysters were sampled in triplicate from each oyster family shucking at 7 time points (0, 6, 12,  
109 24, 48, 60, and 72 hours post-infection). The shell was removed and the whole oyster was flash frozen  
110 in liquid nitrogen. Oyster pools (10 oysters per pool) were ground in liquid nitrogen in 50 ml stainless  
111 steel bowls with 20mm diameter grinding balls (Retsch MM400 mill). The powders obtained were  
112 stored at -80°C prior to RNA and DNA extraction.

113

### 114 **DNA extraction and quantification of OsHV-1 and total bacteria.**

115 DNA extraction was performed as described in [21] using the Nucleospin tissue kit (Macherey-Nagel).  
116 DNA concentration and purity were checked with a NanoDrop One (Thermo Scientific).  
117 Quantification of OsHV-1 and total bacteria were performed using quantitative PCR (qPCR, Roche  
118 LightCycler 480 Real-Time thermocycler) with the following program: enzyme activation at 95°C  
119 for 10 min, followed by 40 cycles of denaturation (95°C, 10 s), hybridization (60°C, 20 s) and  
120 elongation (72°C, 25 s). The total qPCR reaction volume was 1.5 µL with 0.5 µL of DNA  
121 (40 ng µl<sup>-1</sup>) and 1 µL of LightCycler 480 SYBR Green I Master mix (Roche) containing 0.5 µM  
122 of PCR primers. Absolute quantity of OsHV-1 was determined using virus-specific primer pair  
123 targeted the OsHV-1 DNA polymerase catalytic subunit (AY509253, Fw: 5'-  
124 ATTGATGATGTGGATAATCTGTG-3' and Rev: 5'-GGTAAATACCATGGTCTTGTTC-3') and  
125 was calculated by comparing the observed C<sub>q</sub> values to a standard curve of the DNA polymerase  
126 catalytic subunit amplification product cloned into the pCR4-TOPO vector (Invitrogen). Relative  
127 quantification of total bacteria 16S rDNA gene was determined using primer pair targeting the variable  
128 V3V4 loops (341F: 5'-CCTACGGGNGGCWGCAG-3' and 805R: 5'-  
129 GACTACHVGGGTATCTAATCC-3') [26] and was calculated by the 2<sup>-ΔΔC<sub>q</sub></sup> method [27] with the  
130 mean of the measured threshold cycle values of two reference genes (*Cg-BPI*, GenBank: AY165040,  
131 *Cg-BPI* F: 5'-ACGGTACAGAACGGATCTACG-3' and *Cg-BPI* R: 5'-  
132 AATCGTGGCTGACATCGTAGC-3' and *Cg-actin*, GenBank: AF026063, *Cg-actin* F: 5'-  
133 TCATTGCTCCACCTGAGAGG-3' and *Cg-actin* R: 5'AGCATTTCCTGTGGACAATGG-3') [21].

134

### 135 **Analyses of bacterial microbiota**

136 Bacterial metabarcoding was performed using 16S rRNA gene amplicon sequencing. Libraries were  
137 generated using the Illumina two-step PCR protocol targeting the V3-V4 region [26]. A total of 252  
138 libraries (six families × seven sampling time points × three replicates × two infectious environments)  
139 were paired-end sequenced with a 2 × 250 bp read length at the Genome Quebec platform on a MiSeq  
140 system (Illumina) according to the manufacturer's protocol. A total of 41,012,155 pairs of sequences  
141 were obtained. Metabarcoding data was processed using the FROGS pipeline [28]. Briefly, paired  
142 reads were merged using FLASH [29]. After cleaning steps and singleton filtering, 26,442,455  
143 sequences were retained for further analyses. After denoising and primer/adaptor removal with  
144 CUTADAPT, clustering was performed using SWARM, which uses a two-step clustering algorithm  
145 with a threshold corresponding to the maximum number of differences between two Operational  
146 Taxonomic Units (OTU) (denoising step  $d = 1$ ; aggregation distance = 3) [30]. Chimeras were  
147 removed using VSEARCH [31]. Resulting OTUs were affiliated using Blast+ against the Silva  
148 database (release 128).

149

### 150 **Bacterial metatranscriptomic data**

151 Powder obtained from the frozen oysters was resuspended in Trizol, and total RNA was extracted  
152 using a Direct-zol<sup>TM</sup> RNA Miniprep kit. Polyadenylated mRNAs (*i.e.*, oyster mRNAs) were removed  
153 using a MICROBEnrich<sup>TM</sup> Kit (Ambion). cDNA oriented sequencing libraries were prepared as  
154 described in [22] using the Ovation Universal RNA-Seq system (Nugen). Library preparation included  
155 steps to remove oyster nuclear, mitochondrial, and ribosomal RNAs, as well as bacterial rRNAs [22].  
156 A total of 36 libraries (three families × two sampling timepoints × three replicates × two infectious  
157 environments) were sequenced by the Fasteris company (Switzerland, <https://www.fasteris.com>) in  
158 paired-end mode (2 × 150 bp) on an Illumina HiSeq 3000/4000 to obtain 200-300 million clusters per  
159 sample (**Supplementary Table 1**).

160 Raw Illumina sequencing reads from the resulting 72 fastq files (R1 and R2) were trimmed using  
161 Trimmomatic v0.38 (in paired-end mode with no minimum length reads removal). rRNA reads (both  
162 eukaryotic and bacterial) were removed using SortmeRNA v2.1b with the rRNA Silva database  
163 (release 128) and unmerged, using SortmeRNA 'unmerge-paired-reads.sh'. At this stage, about 9% of  
164 reads were removed, underscoring the efficiency of experimental rRNA removal during library  
165 preparation (**Supplementary Figure 1**).

166 To further enrich for bacterial sequences, unpaired reads were successively mapped by Bowtie2 [32]  
167 (very-sensitive-local mode) on a multifasta file containing *Crassostrea gigas* genome sequence v9,  
168 complemented by *C. gigas* EST (available from NCBI), and a multifasta file containing the sequences  
169 of OsHV-1 (present in diseased oysters) and other viral sequences previously associated with bivalves  
170 [33]. Unmapped reads, which represented 4-10% of the starting reads (depending on conditions) were  
171 retained for further analysis (**Supplementary Table 1**). Trimmomatic was used again to retrieve  
172 paired-reads and remove reads less than 36 nt long. All remaining reads corresponding to the 36  
173 samples were pooled (516,786,580 reads, 36-150 nt) and assembled using Trinity v2.3.2 in paired-end,  
174 default mode to build a reference metatranscriptome (1,091,409 contigs, 201-15,917 nt). The resulting  
175 metatranscriptome was annotated using Diamond BlastX against the NCBI nr protein database [34].  
176 48.4 % of the contig encoded proteins aligned with a protein in the database, and were further assigned  
177 to a taxa using Megan 6-LR Community Edition [35]. Sequences were annotated at different  
178 taxonomic levels from species to phylum. Out of the 1,091,409 contigs, 352,473 contig-encoded ORFs  
179 aligned with bacterial proteins by BlastX with an E-value  $\leq 01^e-06$  and constituted the bacterial  
180 metatranscriptome. For each contig, the best hit was kept. In this metatranscriptome, 54,359 annotated  
181 proteins were encoded by the seven genera which were retained for further analysis.

182 In addition of the gene level, genes were expertly annotated at three functional levels: functions,  
183 subcategories and functional categories. First, we defined 31 functional categories (**Supplementary**  
184 **Table 2**). Out of the 54,359 proteins, 9,649 were annotated as “hypothetical”, “unknown”, or  
185 “unnamed”, and were assigned to the category “Unknown function”. Using information present in  
186 protein databases (NCBI protein, Uniprot, etc.), such as PFAM domains, KEGG number, GO  
187 annotation, each unique protein was manually assigned to one of the 30 remaining functional

188 categories. Secondly, each protein was assigned to subcategories, and genes coding for a same  
189 function in the same genus (subunits of the same protein complex or enzymatic activity; orthologues  
190 with the same function) were manually grouped to produce a reduced table of 9,975 functions.

191

## 192 **Quantification of gene expression and data normalization**

193 For each of the 36 samples used for the assembly of the metatranscriptome, reads were mapped back  
194 onto the bacterial metatranscriptome by Bowtie2 in paired-end mode. Raw counts per features (*i.e.*,  
195 per contig) were computed using HTseq-Count [36]. For each contig, and for each sample, raw counts  
196 were normalized to TPM (Transcripts per Kilobase / Million = Mapped reads / Length of contig (kb) /  
197 Scaling factor with Scaling factor = total reads in a sample / 1,000,000), which corrects for contig  
198 length and differences in read number in the different samples. In many cases, the same protein  
199 (having the same unique ID) could be encoded by several contigs, either because gene assembly into a  
200 contig was non-contiguous, or because of the existence of contig isoforms.

201 When analyzing the functions in the seven genera that predominated in the microbiota of diseased  
202 oysters, such contigs that encoded the same protein were merged into a single annotation, and their  
203 expression levels were summed prior to further normalizaion. First, a pseudo count of one read was  
204 added to each gene in each condition/replicate to avoid dividing by zero, then the resulting counts  
205 were normalized by dividing by the total number of counts of the genus in a given condition/replicate,  
206 and further multiplying by 10,000. For a given gene or function, differential expression was defined as  
207 the ratio of the average normalized expression level of the replicates at T60 or 72 over the average  
208 normalized expression level at T0, called the expression ratio (ER).

209

## 210 **Statistical analyses**

211 Survival curves were used to determine differential mortality kinetics between oyster families with the  
212 non-parametric Kaplan-Meier test (Mantel-Cox log-rank test,  $p < 0.05$ , GraphPad\_Prism 6.01). For  
213 OsHV-1 and total bacteria quantifications, significant differences between resistant and susceptible  
214 oyster families were determined using the non-parametric Mann Whitney test ( $p < 0.05$ ,  
215 GraphPad\_Prism 6.01). For bacterial metabarcoding, statistical analyses were performed using R  
216 v3.3.1 (<http://www.R-project.org>, [37]). Principal coordinate analysis (PCoA, “phyloseq”) on a Bray-  
217 Curtis distance matrix (ordinate, “phyloseq”) was performed to determine dissimilarities between  
218 samples. Multivariate homogeneity of group dispersions was tested between bacterial assemblages of  
219 the six oyster families using 999 permutations (permutest, betadisper, “vegan”). DESeq2 (“DESeq”,  
220 [38]) from OTUs to the higher taxonomic ranks was used to identify candidate taxa whose abundance  
221 changed between the initial and final time points of the experiment. Heatmaps of significant genera  
222 were computed using relative abundances and the heatmap2 function “ggplots” [39]. For bacterial



223 metatranscriptomics, significance of differential expression between two conditions (*i.e.*, T60 or T72  
224 vs T0) was assessed at the level of genes and functions using Student's t-test ("t.test" function) after  
225 controlling for the presence of at least three values (reads in three replicates) in one condition and for  
226 variance homogeneity ("var.test" function). Functional enrichment analyses were computed using  
227 genes that were significantly differentially expressed to identify over- and underrepresented functional  
228 categories or subcategories. These analyses were done for each genus using the list of significant  
229 genes (up or down) and the Fisher's exact test (R package {stats}, fisher.test). P-values of  
230 metatranscriptomics were corrected for multiple comparisons using Benjamini and Hochberg's  
231 method ("p.adjust" function) (false discovery rate (FDR) < 0.05).

232 Lastly, a permutational approach was used to test if the number of specific overexpressed metabolic  
233 functions was higher than expected randomly in each environment. This analysis was done on the  
234 whole and the core functions (*i.e.*, functions shared by the seven genera) in order to test specificity on  
235 a similar bacterial genetic background. The significance was assessed by resampling without  
236 replacement ("sample" function, MASS package) the metabolic dataset to draw out the expected null  
237 distribution. More precisely, we made 999 random matrices of the number of overexpressed functions  
238 identified in the seven genera using the reference dataset of each environment. We then compared the  
239 observed value to the expected distribution to compute a p-value based on the number of random  
240 samples that showed higher number of specific functions.

241

#### 242 **Data availability**

243 Metabarcoding and RNAseq sequence data are available through the SRA database (BioProject  
244 accession number PRJNA423079). For bacterial metatranscriptomic, SRA accessions of BioSamples  
245 were SAMN15461557 to SAMN15461592. For bacterial metabarcoding SRA accessions of  
246 BioSamples were SAMN15462520 to SAMN15462771. Large supplementary files are available in the  
247 OSF database (<https://osf.io/kybva/>). Other data generated from this study are included in the  
248 published version of this article and its supplementary files.

249

## 250 RESULTS

### 251 Primary OsHV-1 infection and secondary bacteremia are conserved in POMS, independently of 252 the infectious environment

253 Six *C. gigas* families were subjected to two experimental infections mimicking disease transmission in  
254 the wild. We previously reported high variability in the dynamics of mortality and final percentage  
255 survival of oyster families confronted with an Atlantic infectious environment. Specifically, the F11,  
256 F14, and F15 families were highly susceptible (survival rate < 4% after 330h) to POMS, whereas the  
257 F21, F23, and F48 families were highly resistant (survival rate > 82% after 330h) [21]. Similar results  
258 were obtained in the present study when the same oyster families were confronted with a  
259 Mediterranean infectious environment: families F11, F14, and F15 were susceptible (survival rates <  
260 9%), whereas families F21, F23, and F48 were resistant (survival rates > 88%) (**Figure 1**). Thus, these  
261 oyster families displayed similar phenotypes when confronted with two different infectious  
262 environments (Mantel-Cox log-rank test,  $p < 0.0001$  for each comparison of resistant vs. susceptible  
263 oyster families). Susceptible and resistant oyster families are hereafter referred to as S ( $S_{F11}$ ,  $S_{F14}$ , and  
264  $S_{F15}$ ) and R ( $R_{F21}$ ,  $R_{F23}$ , and  $R_{F48}$ ), respectively.

265 We then compared pathogenesis between the two infectious environments by monitoring OsHV-1  
266 load, microbiota dynamics, and bacterial abundance in the three resistant and three susceptible oyster  
267 families (**Figure 2**). OsHV-1 DNA was detected in all families, regardless of whether they were  
268 confronted with the Atlantic or Mediterranean infectious environment (**Figure 2a**). However, very  
269 intense viral replication occurred only in the susceptible oyster families: viral DNA loads were 2 to 3  
270 logs higher than in resistant oysters at 24 h (**Figure 2a**).

271 The dynamics of the oyster microbiota was studied in the six oyster families by monitoring bacterial  
272 community composition using 16S rRNA gene metabarcoding over the first 3 days of both  
273 experimental infections. A total of 45,686 bacterial OTUs were obtained from the 252 samples and  
274 affiliated at different taxonomic ranks (**Supplementary Table 3**). Changes in microbiota composition  
275 were greater in susceptible oysters than in resistant oysters at all taxonomic ranks (**Supplementary**  
276 **Figure 2**). Indeed, for the Atlantic infectious environment, 52, 43, and 54 OTUs significantly differed  
277 (in terms of relative abundance between the start and end of the experiment) in susceptible oysters  
278  $S_{F11}$ ,  $S_{F14}$  and  $S_{F15}$ , respectively; only 1, 11, and 9 OTUs significantly differed in resistant oysters  $R_{F21}$ ,  
279  $R_{F23}$  and  $R_{F48}$ , respectively (**Supplementary Table 4**). The same trend was observed in the  
280 Mediterranean infectious environment. 11, 47, and 43 OTUs significantly differed in  $S_{F11}$ ,  $S_{F14}$  and  
281  $S_{F15}$ , respectively, as opposed to 2, 8, and 6 OTUs in  $R_{F21}$ ,  $R_{F23}$  and  $R_{F48}$ , respectively.

282 PCoA on a Bray-Curtis dissimilarity matrix (beta diversity) revealed higher microbiota dispersion in  
283 susceptible oyster families than in resistant families in both infectious environments (multivariate  
284 homogeneity of groups dispersion, d.f. = 1;  $p = 0.016$  and  $p = 0.020$  for Atlantic and Mediterranean

285 environments, respectively) (**Figure 2b and 2c**). This disruption of the bacterial community structure  
286 occurred in susceptible oysters between 24 h and 48 h, concomitantly with the active replication of  
287 OsHV-1. In addition, susceptible oyster families displayed a significantly greater bacterial load than  
288 resistant oysters when confronted with either the Atlantic or the Mediterranean infectious environment  
289 (Mann Whitney test,  $p < 0.05$ ; **Figure 2d**). This increase started at 60 h and continued until the end of  
290 the experiment (72 h). Total bacterial abundance in susceptible oysters was more than 5-fold higher at  
291 72 h than at T0, which indicated bacterial proliferation. In contrast, total bacterial load remained stable  
292 in resistant oysters.

293

#### 294 **A core pathobiota infects oysters during secondary bacterial infection in POMS**

295 All bacterial genera that changed significantly in abundance during the two experimental infections  
296 (Atlantic and Mediterranean) in susceptible oyster families are reported in **Supplementary Table 4**.  
297 We focused on well-represented genera representing  $> 2\%$  of the bacteria in at least one sample for  
298 each susceptible oyster family confronted with each infectious environment (**Figure 3**). In the Atlantic  
299 infectious environment and for susceptible families, the corresponding OTUs represented a total of  
300 4%, 0.8%, and 46% of total bacteria at the beginning of the experiment (T0), as opposed to 73%, 75%,  
301 and 72% at 72 h for  $S_{F11}$ ,  $S_{F14}$ , and  $S_{F15}$ , respectively (**Supplementary Table 4**). In the Mediterranean  
302 infectious environment and for susceptible families, these OTUs increased from 2%, 6%, and 7% at  
303 T0 to 47%, 56%, and 56% at 72 h for  $S_{F11}$ ,  $S_{F14}$ , and  $S_{F15}$ , respectively. From nine to twenty genera  
304 increased significantly in relative abundance between T0 and 72 h. Ten genera (*Arcobacter*,  
305 *Cryomorphaceae*, *Marinobacterium*, *Marinomonas*, *Proxilibacter*, *Pseudoalteromonas*,  
306 *Psychrilyobacter*, *Psychrobium*, *Psychromonas*, and *Vibrio*) were common to almost all (5 of 6)  
307 susceptible oyster families and both infectious environments (**Figure 3**). Most of the remaining genera  
308 (*Aquibacter*, *Aureivirga*, *Fusibacter*, *Neptunibacter*, *Peredibacter*, *Pseudofulvibacter*) were shared by  
309 at least two families in one infectious environment. One genus (*Salinirepens*) increased significantly in  
310 all susceptible oysters in the Atlantic infectious environment only. These results show that a core of  
311 bacterial genera infects oysters during the POMS secondary bacterial infection, independently of the  
312 infectious environment. In resistant oyster families, several taxa also varied significantly in abundance  
313 over time. Most of these taxa were also present in susceptible oyster families (**Supplementary Figure**  
314 **3**), but at low abundances. These taxa represent between 4% to 23% of the reads sequenced at 72h in  
315 resistant oysters, whereas they represent 47% to 75% of the reads sequenced in susceptible oysters  
316 (**Supplementary Table 4**).

317

#### 318 **Seven genera are responsible for most bacterial gene expression in diseased oysters**

319 To understand the infection success of certain genera, we analyzed the gene expression of the  
320 pathobiota using metatranscriptomics. As the secondary bacterial infection did not occur in resistant  
321 oysters, it seemed difficult to obtain from these oysters a sequencing depth for bacteria sufficient for  
322 subsequent analysis, and we chose to restrict the metatranscriptomic analysis to the three different  
323 susceptible families  $S_{F11}$ ,  $S_{F14}$ , and  $S_{F15}$ , from both Atlantic and Mediterranean infectious  
324 environments, at T0 and just before oyster mortality occurred (*i.e.*, at 60 h and 72 h for the Atlantic  
325 and the Mediterranean infectious environments, respectively). Three biological replicates were  
326 analyzed for each condition, corresponding to a total of 36 biological samples, 8,4 billion reads  
327 assembled into 352,473 contigs, and 225,965 unique proteins.

328 Seven genera were consistently found to contribute to most of transcriptomic activity in diseased  
329 oysters, displaying a strong relative increase of the number of transcripts compared to healthy oysters  
330 (**Figure 4**). *Amphritea*, *Arcobacter*, *Marinobacterium*, *Marinomonas*, *Oceanospirillum*,  
331 *Pseudoalteromonas*, and *Vibrio* were together responsible for up to 40% of the total bacterial  
332 transcriptomic activity detected just before the onset of oyster mortality. Among them, only *Amphritea*  
333 and *Oceanospirillum* were not part of the core pathobiota identified using metabarcoding, even though  
334 *Amphritea* was significantly increased in  $S_{F14}$ . Six out of seven genera are Gammaproteobacteria:  
335 while *Amphritea*, *Marinobacterium*, *Marinomonas* and *Oceanospirillum* belong to the same family  
336 (Oceanospirillaceae) and order (Oceanospirillales), *Arcobacter* belongs to the class  
337 Epsilonproteobacteria.

338 These results indicate that a limited number of genera participate in the secondary bacteremia that  
339 occurs in POMS. These genera are remarkably conserved between the different susceptible oyster  
340 families. Therefore, we focused our analyses on these seven genera, considering samples from all  
341 three susceptible families as replicates and comparing two time points (T0 vs. 60 h or 72 h for the  
342 Atlantic or the Mediterranean infectious environments, respectively) and the two different  
343 environments. The pathobiota constituted by these seven genera corresponded to 106,312 contigs and  
344 54,359 unique proteins (query and subject in **Supplementary Table 5**).

345

#### 346 **The seven bacterial genera showed reproducible differential expression patterns in both** 347 **environments**

348 For each genus, and each infectious environment, normalized expression levels were estimated at the  
349 gene level (**Supplementary Table 6**). To each gene was attributed a function, a functional category  
350 and a subcategory.

351 We first compared the variation of the expression pattern at the level of functional categories between  
352 the time of exposure to the infectious environment (T0) and the onset of mortality (*i.e.*, at 60 h and 72  
353 h for the Atlantic and the Mediterranean infectious environments, respectively), for the seven bacterial

354 genera in both environments (**Figure 5**). With the exception of the category “Translation/ ribosomal  
355 structure and biogenesis” (translation for short), which was globally overexpressed, a striking fact was  
356 the specific differential expression pattern of each genus. A clustering analysis of the differential  
357 expression of the functional categories showed that, for a given genus, the two environments generated  
358 a very similar pattern of differential gene expression.

359

### 360 **Translation and central metabolism were significantly overexpressed by pathobiota during the** 361 **infectious process**

362 To identify the genes underpinning successful infection by the seven bacterial genera, we next  
363 computed a comparison between T0 and the onset of mortality. For each genus, and each infectious  
364 environment, expression levels were compared at the gene level (**Supplementary Table 6**). For each  
365 bacterial genus, a majority of genes were overexpressed within each environment (**Supplementary**  
366 **Figure 4**), and overexpression seemed to affect more genes in the Atlantic than in the Mediterranean  
367 environment.

368 Gene set enrichment analyses were carried-out using significantly over- or underexpressed genes from  
369 the **Supplementary Table 6** to identify over- and underrepresented functional categories. While no  
370 category was significantly enriched for underexpressed genes, the translation category was found to be  
371 overrepresented in the overexpressed genes, for all genera and in both environments (except *Vibrio* in  
372 the Mediterranean environment) (**Supplementary Figure 5**), consistent with a general increase of  
373 expression of genes from this category in diseased oysters (**Figure 5**). In addition, the category  
374 “Precursor metabolite and energy production” (central metabolism for short) was significantly  
375 enriched in the overexpressed genes of four out of seven genera, *Amphritea*, *Marinobacterium*,  
376 *Marinomonas* and *Oceanospirillum*.

377 We then computed enrichment analyses within both categories of translation and central metabolism  
378 in order to identify overrepresented subcategories. The two subcategories of 30S and 50S ribosomal  
379 proteins were found to be overrepresented for most genera amongst the overexpressed genes  
380 (**Supplementary Figure 6**) whereas oxidative phosphorylation was overrepresented for two genera in  
381 the case of the central metabolism category (**Supplementary Figure 7**).

382

### 383 **Metabolic complementarity might explain reproducible composition of bacterial assemblages**

384 The enrichment during the infection process in the overexpressed gene set of the central metabolism  
385 category (**Supplementary Figure 5**), and, especially, of the oxidative phosphorylation subcategory,

386 (Supplementary Figure 7) suggest that changes in metabolic activity are important for the successful  
387 establishment of the pathobiota.

388 Accordingly, we focused the next analyses on genes involved in metabolic categories. In particular,  
389 we compared the different genera for the differential expression of transcripts from the categories of  
390 amino acids, carbon compounds, lipids, nitrogen compounds, central metabolism, and sulfur  
391 compounds (see Supplementary Table 2). To perform the analyses at the scale of metabolic  
392 functions, the whole dataset was reduced by grouping genes having the same function (subunits of the  
393 same protein or enzymatic complex; see Methods). Then, for each genus and each infectious  
394 environment, expression levels were compared between T0 and the onset of mortality (*i.e.*, at 60 h and  
395 72 h for the Atlantic and the Mediterranean infectious environments, respectively) for all functions  
396 (Supplementary Table 7).

397 The seven genera showed very few similarities in terms of significantly overexpressed metabolic  
398 functions. Indeed, only 5 out of 222 metabolic functions were increased in at least four genera in the  
399 Atlantic or the Mediterranean environment, all of them belonging to the category of central  
400 metabolism: ATP synthase (oxidative phosphorylation), dihydrolipoyl dehydrogenase (pyruvate  
401 metabolism), cytochrome-c oxidase, cbb3-type (respiratory electron transfer), glyceraldehyde 3-  
402 phosphate dehydrogenase and triose-phosphate isomerase (glycolysis/gluconeogenesis)  
403 (Supplementary Table 8).

404 Most overexpressed metabolic functions were specific of a single genus in the Atlantic (68.39%;  
405 119/174 functions) and in the Mediterranean environment (77.08%; 37/48). In order to estimate the  
406 significance of these specificities, permutational analyses were computed and revealed that these high  
407 ratios of specific functions were higher than expected randomly ( $p=0.001$  in both environments).  
408 These analyses were also done on the core metabolic functions (*i.e.*, functions shared by the seven  
409 genera) in order to avoid bias due to different genetic backgrounds. For the overexpressed core  
410 functions, 54.55% (36/66) and 72% (18/25) were specific of a single genus in the Atlantic and the  
411 Mediterranean environment, respectively. Permutational analyses also highlighted that these high  
412 ratios were significant ( $p=0.001$  in both environments).

413

#### 414 **Oysters provide a diverse set of nutritive sources to the pathobiota**

415 In addition to Supplementary Table 8, Figure 6 and Supplementary Figure 8 present a schematic  
416 view of the main metabolic changes in the pathobiota and the respective contribution of each genus.  
417 All of them contributed to some extent to an increase of the main pathways of central metabolism,  
418 glycolysis/neoglucogenesis,  $\beta$ -oxidation, TCA cycle, respiratory electron transfer and oxidative  
419 phosphorylation, and pentose phosphate and PRPP biosynthesis but each of them in a specific way.

420 Overall, the pathobiota metabolic network reflected the diversity of the nutrients available in the  
421 diseased oysters. Thus, amino acids, in degraded tissues, can be a major source of carbon,  
422 neoglucogenesis being favored to glycolysis in central metabolism, as seen in *Marinobacterium*,  
423 *Oceanospirillum*, *Pseudoalteromonas*, and *Vibrio*. Consistent with this was the increase of several  
424 amino acid degradation pathways in these genera. In this rich environment, other carbon sources are  
425 available: aromatic compounds and xenobiotic compounds such as atrazine (*Marinomonas*) or  
426 isoprene (*Amphritea*, *Pseudoalteromonas*). Glycogen, which is especially abundant in oysters, and  
427 host glycans, are potential sources of glucose. *Pseudoalteromonas* and *Vibrio* showed an increase in  
428 the use of several sugars and sugar derivatives (**Supplementary Table 8**).

429 In dying oysters, the environment could evolve towards microaerobic to anaerobic conditions,  
430 favoring in certain genera the activation of nitrate respiration (*Amphritea*, *Arcobacter*,  
431 *Marinobacterium* and *Marinomonas*) or L-carnitine respiration (*Marinomonas*, Atlantic environment).  
432 In addition, the formate dehydrogenase (increasing in *Arcobacter* and *Oceanospirillum*) could also  
433 play a role in nitrate or other final electron acceptor respiration. Oysters are also rich in taurine [40],  
434 whose catabolism is highly induced in *Marinomonas*. In addition to carbon, and nitrogen, Taurine can  
435 also be a source of sulfur.

436 Changes of expression of several sulfur metabolism pathways were also observed in all genera, except  
437 in *Oceanospirillum* and *Vibrio*. Finally, activation of  $\beta$ -oxidation (*Amphritea*, *Marinobacterium* and  
438 *Pseudoalteromonas*) indicates that fatty acids are also used as nutrients.

439

#### 440 **Specific patterns of adaptive responses in the different bacterial genera during the infection**

441 Other functions that might be key to successful host infection are functional categories that are  
442 important for survival in the host and/or pathogenicity, such as adhesion, cell defense, metal  
443 homeostasis, redox homeostasis and oxidative stress, stress response, and virulence factors  
444 (**Supplementary Table 9**). Each genus displayed some responses to such stresses, with varying  
445 specific strategies. We found a varying repertoire of genes involved in the maintenance of intracellular  
446 reducing potential, such as thioredoxin and glutaredoxin, that play an important role in reducing  
447 protein disulfide bonds in the cytoplasm [41] as well as genes coding for peroxidase and superoxide  
448 dismutases, which are important for the oxidative stress response, whose expression was either  
449 decreased or increased. For metal homeostasis, the main response was to maintain iron concentration.  
450 More widely shared between genera, was the induction of genes coding for formaldehyde  
451 dehydrogenase, an aldehyde-detoxifying enzyme, of cold shock protein genes and genes coding for the  
452 ribosome-associated translation inhibitor RaiA. Interestingly, cold shock proteins are often RNA  
453 chaperons which are important for ribosome biogenesis [42]. The induction of RaiA and cold shock  
454 proteins could reflect the very high translation activity in the pathobiota. Finally, in the

455 fitness/virulence gene category, genes whose expression was significantly affected belonged to the  
456 fitness (competition between bacteria) rather than host interactions category.

457



458 **DISCUSSION**

459 **POMS pathobiota is composed of a few and reproducible number of active bacterial genera**

460 Until recently, only members of the *Vibrio* genus had been repeatedly associated with POMS. These  
461 studies used culture-based approaches to investigate oyster-associated bacterial communities [19,20].  
462 *Vibrio* species associated with POMS were characterized by key virulence factors that are required to  
463 weaken oyster cellular defenses [22,43]. Members of the *Arcobacter* genus had also been associated  
464 with POMS-diseased oysters [44,45], but the role of this genus in pathogenesis was not investigated  
465 more deeply due to limitations of culture-based techniques [46]. In the present study, we showed that  
466 the dysbiosis associated with POMS was conserved across infectious environments. Using  
467 metabarcoding, we demonstrated that diseased oysters affected by POMS are colonized by a common  
468 consortium of bacteria composed by ten major genera (*Arcobacter*, *Cryomorphaceae*,  
469 *Marinobacterium*, *Marinomonas*, *Proxilibacter*, *Pseudoalteromonas*, *Psychrilyobacter*, *Psychrobium*,  
470 *Psychromonas*, and *Vibrio*), whereas metatranscriptomic data showed that five of these genera  
471 (*Arcobacter*, *Marinobacterium*, *Marinomonas*, *Pseudoalteromonas* and *Vibrio*) displayed a high  
472 transcriptomic activity, and identified two additional active genera (*Amphritea* and *Oceanospirillum*),  
473 thus extending the core bacterial consortium to five additional bacterial genera. The discovery of the  
474 contributions of these genera, which are responsible for up to 40% of the bacterial transcriptional  
475 activity observed in POMS, provides new insights into the pathogenesis. Altogether, our results  
476 strongly suggest that a core microbiota, rather than specific bacterial pathogens, operates as a  
477 functional unit of pathogenesis. Together with OsHV-1, these bacteria form the POMS pathobiota.  
478 POMS secondary bacteremia may resemble periodontitis in humans, in which the evolution of the  
479 disease is characterized by the development of a pathogenic consortium comprising a limited number  
480 of species [47,48].

481 We used metatranscriptomics to unveil the functions of the microbiota in relation to POMS. Bacterial  
482 metatranscriptomics from host tissues is technically challenging (due to the low proportion of bacterial  
483 transcripts in the host samples), but it provides functional information that is thought to more  
484 accurately portray the role of the microbiota in health and disease states [49]. Accordingly, gene  
485 expression profiling has proven highly successful in advancing the understanding of the dynamics of  
486 disease-associated microbial populations [50]. In the case of POMS, by linking functional genes to the  
487 bacterial genera which encode them, we found a remarkably consistent relationship between the  
488 structure of bacterial communities (using 16S metabarcoding) and the functions expressed by bacterial  
489 genera in the communities (using metatranscriptomics), with the exception of *Amphritea* and  
490 *Oceanospirillum*, which were not detected as significantly more abundant at the onset of mortality by  
491 metabarcoding (except *Amphritea* in one condition) despite their significant contribution to the  
492 pathobiota transcriptional activity. This might be explained by the fact that detection of transcriptional

493 activity might be more sensitive than metabarcoding, allowing detection at an earlier time [51],  
494 suggesting that these two genera might become abundant at a later step of oyster infection.

#### 495 **A pathogenicity independent of bacterial virulence factors?**

496 Surprisingly, only a very few numbers of putative virulence genes have been identified as significantly  
497 overexpressed in the seven genera. Indeed, overexpressions were significant for a limited number of  
498 genes in *Marinomonas* (1 out of 11 genes in the Mediterranean environment), and *Pseudoalteromonas*  
499 (4 and 3 out of 76 genes in Atlantic and the Mediterranean environment, respectively). First, this result  
500 might be explained by a lack of knowledge concerning virulence genes in the seven genera. Indeed,  
501 while more than 76 genes were listed in this category for *Pseudoalteromonas* or *Vibrio* in this study,  
502 less than 13 genes were annotated as virulence/fitness for the other genera. Other candidates may be in  
503 the unknown function category. However, virulence genes of *Vibrio* are well described [22,43], and  
504 none of these genes were significantly modified. It is also possible that virulence genes were only  
505 overexpressed at the onset of the infection process, and not anymore at this late stage. Future studies  
506 analyzing the microbiota transcriptomes over time could help resolve this infection-related question.  
507 In addition, a transcriptomic analysis of oysters will also be useful to describe host responses to the  
508 infection and their immune status [21,22].

#### 509 **Functional reprogramming centered on bacterial metabolism**

510 Our metatranscriptomic analysis highlighted the specificity of the genera that compose the pathobiota,  
511 both in term of metabolism expression (**Supplementary Table 8**), and of adaptation to the host  
512 (**Supplementary Table 9**). However, a few core functions, that were overexpressed in at least four  
513 genera, was also identified. The most conserved response was a strong induction of genes involved in  
514 translation (**Supplementary Figures 4 and 5**), constituting a set of genes enriched in ribosomal  
515 proteins (**Supplementary Figure 6**). Interestingly, genes coding for cold shock proteins, which are  
516 often RNA chaperones involved in translation and ribosome biogenesis [42] were also part of this  
517 functional core genes. Finally, genes for “ATP synthase” and “cytochrome c-oxidase, cbb3 type”,  
518 encoding two major components of oxidative phosphorylation and respiration, were induced in five  
519 and four genera, respectively.

520 Beside this limited core response, a high and significant proportion of metabolic functions was  
521 overexpressed in only one genus in both environments (**Supplementary Table 8**), suggesting that  
522 each genus used different sources and different metabolic pathways. Thus, the pathobiota metabolism  
523 reflects on one hand the environment provided by immunocompromised and dying oysters (a rich  
524 medium, constituting an abundant source of amino acids and lipids, sustaining a high central  
525 metabolism and growth rate) and, on the other hand, the specific metabolic expression of each genus.

526 This specificity might be the basis of a functional complementation between the bacterial genera. First,  
527 this complementarity might be the result of synergy between genera through involvement in different  
528 steps of biogeochemical cycles; the growth of one genus favoring the growth of others. For example,  
529 metabolic complementarity was proposed between two bacterial symbionts of sharpshooters for  
530 histidine and essential amino acids based on genomic analyses [52]. However, we did not identify a  
531 complementarity similar to a codependency here. In contrast, this complementarity might be linked to  
532 low competition for resources between the different genera, suggesting an optimal use of the diversity  
533 of resources in the oyster environment, which can sustain efficient growth of bacteria with very  
534 different metabolisms. Such a pattern of coexistence through low nutritive competition (also named  
535 resource partitioning) was already observed for several taxa, such as fishes [53], hoverflies [54], and  
536 honey bee gut bacteria [55]. In this last study, it was demonstrated thanks to metatranscriptomics and  
537 metabolomics that bacterial species used different carbohydrate substrates. This result indicated  
538 resource partitioning as the basis of coexistence within honey bee gut, and the longstanding  
539 association with their host. For oysters, we also hypothesized that the metabolic complementarity  
540 identified here using metatranscriptomics might reflect resource partitioning. This complementarity  
541 might explain the reproducible nature of pathobiota assemblages associated with POMS across distinct  
542 environments.

543

## 544 **Conclusions**

545 Using metabarcoding and metatranscriptomics, we found that seven bacterial genera were consistently  
546 present and active in susceptible oysters affected by POMS in two infectious environments. Moreover,  
547 we also found a reproducible nature of the pathobiota composition and transcriptional activity between  
548 both environments (Atlantic and Mediterranean). Thanks to metatranscriptomics, we proposed that the  
549 conservation of this assemblage might be explained by complementary use of resources with lack of  
550 competition between genera. Indeed, oyster tissues might offer conserved ecological niches to the  
551 pathobiota during infection process in both environments. Future studies should perform metabolic  
552 studies of these genera to validate our observations done at the level of gene expression. Lastly, a  
553 temporal analysis of gene expressions of both oysters and microbiota will also help understanding this  
554 polymicrobial process at the early steps of infection.

555

556 **END NOTES**

557 **Acknowledgements.** We warmly thank the staff of the Ifremer stations of Argenton (LPI, PFOM) and  
558 Sète (LER), and the Comité Régional de Conchyliculture de Méditerranée (CRCM) for technical  
559 support in the collection of the oyster genitors and reproduction of the oysters. The authors are grateful  
560 to Philippe Clair from the qPHD platform/Montpellier genomix for useful advice and to Ifremer  
561 bioinformatics department (SeBIMER) for SRA submission. This work benefited from the support of  
562 the National Research Agency under the “Investissements d’avenir” program (reference ANR-10-  
563 LABX-04-01) through use of the GENSEQ platform (<http://www.labex-cemeb.org/fr/genomique-environnementale-2>) from the LabEx CeMEB. The present study was supported by the ANR projects  
564 DECIPHER (ANR-14-CE19-0023) and DECICOMP (ANR-19-CE20-0004), and by Ifremer, CNRS,  
565 Université de Montpellier and Université de Perpignan *via* Domitia. Xing Luo was a recipient of a  
566 fellowship from the China Scholarship Council (CSC). This study is set within the framework of the  
567 “Laboratoires d’Excellence (LABEX)” TULIP (ANR-10-LABX-41).  
568

569

570 **Author contributions**

571 J.D.L., B.P., A.J. and G.M. designed experiments. B.P., J.D.L, A.L., J.M.E., Y.G., L.D. and G.M.  
572 performed oyster experiments. J.D.L., A.L., E.T., C.C. and G.M. performed microbiota analyses.  
573 J.D.L. and A.L. performed qPCR analyses. A.J. and X.L performed the metatranscriptomic  
574 experiments. A.J. C.C. and S.M. analyzed the metatranscriptomic data. J.D.L., A.L., A.J, C.C., S.M.  
575 and G.M. interpreted results. J.D.L., A.L., A.J., C.C., D.D.G. and G.M. wrote the manuscript, which  
576 has been reviewed and approved by all authors.

577

578 **Conflict of interest statement.** There are no conflicts of interest. This manuscript represents original  
579 results and has not been submitted elsewhere for publication.

580

581 **REFERENCES**

- 582 1. EFSA P. Oyster mortality. EFSA Journal. 2015;13:4122-n/a.
- 583 2. Paul-Pont I, Dhand NK, Whittington RJ. Influence of husbandry practices on OsHV-1 associated  
584 mortality of Pacific oysters *Crassostrea gigas*. Aquaculture. 2013;412–413:202–14.
- 585 3. Martenot C, Oden E, Travaillé E, Malas J-P, Houssin M. Detection of different variants of Ostreid  
586 Herpesvirus 1 in the Pacific oyster, *Crassostrea gigas* between 2008 and 2010. Virus Research.  
587 2011;160:25–31.
- 588 4. Renault T, Moreau P, Faury N, Pepin J-F, Segarra A, Webb S. Analysis of clinical ostreid  
589 herpesvirus 1 (Malacoherpesviridae) specimens by sequencing amplified fragments from three virus  
590 genome areas. J Virol. 2012;86:5942–7.
- 591 5. Segarra A, Pépin JF, Arzul I, Morga B, Faury N, Renault T. Detection and description of a  
592 particular Ostreid herpesvirus 1 genotype associated with massive mortality outbreaks of Pacific  
593 oysters, *Crassostrea gigas*, in France in 2008. Virus Research. 2010;153:92–9.
- 594 6. Peeler EJ, Allan Reese R, Cheslett DL, Geoghegan F, Power A, Thrush MA. Investigation of  
595 mortality in Pacific oysters associated with *Ostreid herpesvirus-1*μVar in the Republic of Ireland in  
596 2009. Preventive Veterinary Medicine. 2012;105:136–43.
- 597 7. Lynch SA, Carlsson J, Reilly AO, Cotter E, Culloty SC. A previously undescribed ostreid herpes  
598 virus 1 (OsHV-1) genotype detected in the pacific oyster, *Crassostrea gigas*, in Ireland. Parasitology.  
599 2012;139:1526–32.
- 600 8. Abbadì M, Zamperin G, Gastaldelli M, Pascoli F, Rosani U, Milani A, et al. Identification of a  
601 newly described OsHV-1 μvar from the North Adriatic Sea (Italy). Journal of General Virology.  
602 2018;99:693–703.
- 603 9. Burioli EAV, Prearo M, Houssin M. Complete genome sequence of Ostreid herpesvirus type 1 μVar  
604 isolated during mortality events in the Pacific oyster *Crassostrea gigas* in France and Ireland.  
605 Virology. 2017;509:239–51.
- 606 10. Burioli EAV, Prearo M, Riina MV, Bona MC, Fioravanti ML, Arcangeli G, et al. Ostreid  
607 herpesvirus type 1 genomic diversity in wild populations of Pacific oyster *Crassostrea gigas* from  
608 Italian coasts. Journal of Invertebrate Pathology. 2016;137:71–83.
- 609 11. Fallet M, Montagnani C, Petton B, Dantan L, de Lorgeril J, Comarmond S, et al. Early life  
610 microbial exposures shape the *Crassostrea gigas* immune system for lifelong and intergenerational  
611 disease protection. Microbiome. 2022;10:85.
- 612 12. Petton B, Destoumieux-Garzón D, Pernet F, Toulza E, de Lorgeril J, Degremont L, et al. The  
613 Pacific Oyster Mortality Syndrome, a polymicrobial and multifactorial disease: state of knowledge and  
614 future directions. Front Immunol. 2021;12:630343.
- 615 13. Azéma P, Lamy J-B, Boudry P, Renault T, Travers M-A, Dégremon L. Genetic parameters of  
616 resistance to *Vibrio aestuarianus*, and OsHV-1 infections in the Pacific oyster, *Crassostrea gigas*, at

- 617 three different life stages. *Genet Sel Evol.* 2017;49:23.
- 618 14. Le Roux F, Wegner KM, Polz MF. Oysters and vibrios as a model for disease dynamics in wild  
619 animals. *Trends in Microbiology.* 2016;24:568–80.
- 620 15. Pernet F, Barret J, Le Gall P, Corporeau C, Dégremont L, Lagarde F, et al. Mass mortalities of  
621 Pacific oysters *Crassostrea gigas* reflect infectious diseases and vary with farming practices in the  
622 Mediterranean Thau lagoon, France. *Aquaculture Environment Interactions.* 2012;2:215–37.
- 623 16. Pernet F, Barret J, Marty C, Moal J, Le Gall P, Boudry P. Environmental anomalies, energetic  
624 reserves and fatty acid modifications in oysters coincide with an exceptional mortality event. *Marine*  
625 *Ecology Progress Series.* 2010;401:129–46.
- 626 17. Pernet F, Tamayo D, Fuhrmann M, Petton B. Deciphering the effect of food availability, growth  
627 and host condition on disease susceptibility in a marine invertebrate. *J Exp Biol.* 2019;222:jeb210534.
- 628 18. Petton B, Pernet F, Robert R, Boudry P. Temperature influence on pathogen transmission and  
629 subsequent mortalities in juvenile Pacific oysters *Crassostrea gigas*. *Aquaculture Environment*  
630 *Interactions.* 2013;3:257–73.
- 631 19. Bruto M, James A, Petton B, Labreuche Y, Chenivesse S, Alunno-Bruscia M, et al. *Vibrio*  
632 *crassostreae*, a benign oyster colonizer turned into a pathogen after plasmid acquisition. *The ISME*  
633 *Journal.* 2017;11:1043–52.
- 634 20. Lemire A, Goudenège D, Versigny T, Petton B, Calteau A, Labreuche Y, et al. Populations, not  
635 clones, are the unit of vibrio pathogenesis in naturally infected oysters. *The ISME Journal.*  
636 2015;9:1523–31.
- 637 21. de Lorgeril J, Lucasson A, Petton B, Toulza E, Montagnani C, Clerissi C, et al. Immune-  
638 suppression by OsHV-1 viral infection causes fatal bacteraemia in Pacific oysters. *Nature*  
639 *Communications.* 2018;9:4215.
- 640 22. Rubio T, Oyanedel D, Labreuche Y, Toulza E, Luo X, Bruto M, et al. Species-specific  
641 mechanisms of cytotoxicity toward immune cells determine the successful outcome of *Vibrio*  
642 infections. *Proc Natl Acad Sci USA.* 2019;116:14238–47.
- 643 23. de Lorgeril J, Petton B, Lucasson A, Perez V, Stenger P-L, Dégremont L, et al. Differential basal  
644 expression of immune genes confers *Crassostrea gigas* resistance to Pacific oyster mortality  
645 syndrome. *BMC Genomics.* 2020;21:63.
- 646 24. Petton B, Boudry P, Alunno-Bruscia M, Pernet F. Factors influencing disease-induced mortality of  
647 Pacific oysters *Crassostrea gigas*. *Aquaculture Environment Interactions.* 2015;6:205–22.
- 648 25. Fleury E, Barbier P, Petton B, Normand J, Thomas Y, Pouvreau S, et al. Latitudinal drivers of  
649 oyster mortality: deciphering host, pathogen and environmental risk factors. *Scientific Reports.*  
650 2020;10:7264.
- 651 26. Klindworth A, Pruesse E, Schweer T, Peplies J, Quast C, Horn M, et al. Evaluation of general 16S  
652 ribosomal RNA gene PCR primers for classical and next-generation sequencing-based diversity  
653 studies. *Nucleic Acids Research.* 2013;41:e1.

- 654 27. Pfaffl MW. A new mathematical model for relative quantification in real-time RT-PCR. *Nucleic*  
655 *Acids Research*. 2001;29:45e–45.
- 656 28. Escudié F, Auer L, Bernard M, Mariadassou M, Cauquil L, Vidal K, et al. FROGS: Find, Rapidly,  
657 OTUs with Galaxy Solution. *Bioinformatics*. 2017;doi:10.1093/bioinformatics/btx791.
- 658 29. Magoc T, Salzberg SL. FLASH: fast length adjustment of short reads to improve genome  
659 assemblies. *Bioinformatics*. 2011;27:2957–63.
- 660 30. Mahé F, Czech L, Stamatakis A, Quince C, de Vargas C, Dunthorn M, et al. Swarm v3: towards  
661 tera-scale amplicon clustering. Birol I, editor. *Bioinformatics*. 2021;btab493.
- 662 31. Rognes T, Flouri T, Nichols B, Quince C, Mahé F. VSEARCH: a versatile open source tool for  
663 metagenomics. *PeerJ*. 2016;4:e2584.
- 664 32. Langmead B, Salzberg SL. Fast gapped-read alignment with Bowtie 2. *Nature Methods*.  
665 2013;9:357–9.
- 666 33. Rosani U, Shapiro M, Venier P, Allam B. A needle in a haystack: tracing bivalve-associated  
667 viruses in high-throughput transcriptomic data. *Viruses*. 2019;11:205.
- 668 34. Buchfink B. Fast and sensitive protein alignment using DIAMOND. *Nature Methods*. 2014;12:59–  
669 60.
- 670 35. Huson DH, Albrecht B, Bagci C, Bessarab I, Gorska A, Jolic D, et al. MEGAN-LR: new  
671 algorithms allow accurate binning and easy interactive exploration of metagenomic long reads and  
672 contigs. *Biology Direct*. 2018;13:6.
- 673 36. Anders S, Pyl PT, Huber W. HTSeq—a Python framework to work with high-throughput  
674 sequencing data. *Bioinformatics*. 2015;31:166–9.
- 675 37. R: a language and environment for statistical computing, 2008; R Development Core Team, R  
676 Foundation for Statistical Computing, Vienna, Austria [<http://www.R-project.org>].
- 677 38. Love MI, Huber W, Anders S. Moderated estimation of fold change and dispersion for RNA-seq  
678 data with DESeq2. *Genome Biology*. 2014;15:550.
- 679 39. McMurdie PJ, Holmes S. phyloseq: An R package for reproducible interactive analysis and  
680 graphics of microbiome census data. Watson M, editor. *PLoS ONE*. 2013;8:e61217.
- 681 40. Meng J, Song K, Li C, Liu S, Shi R, Li B, et al. Genome-wide association analysis of nutrient  
682 traits in the oyster *Crassostrea gigas*: genetic effect and interaction network. *BMC Genomics*.  
683 2019;20:625.
- 684 41. Prinz WA, Åslund F, Holmgren A, Beckwith J. The role of the thioredoxin and glutaredoxin  
685 pathways in reducing protein disulfide bonds in the *Escherichia coli* cytoplasm. *Journal of Biological*  
686 *Chemistry*. 1997;272:15661–7.
- 687 42. Keto-Timonen R, Hietala N, Palonen E, Hakakorpi A, Lindström M, Korkeala H. Cold shock  
688 proteins: a minireview with special emphasis on Csp-family of enteropathogenic *Yersinia*. *Front*  
689 *Microbiol*. 2016;7:1151.
- 690 43. Piel D, Bruto M, James A, Labreuche Y, Lambert C, Janicot A, et al. Selection of *Vibrio*

- 691 *crassostreae* relies on a plasmid expressing a type 6 secretion system cytotoxic for host immune cells.  
692 Environ Microbiol. 2020;22:4198–211.
- 693 44. Lasa A, di Cesare A, Tassistro G, Borello A, Gualdi S, Furones D, et al. Dynamics of the Pacific  
694 oyster pathobiota during mortality episodes in Europe assessed by 16S rRNA gene profiling and a new  
695 target enrichment next-generation sequencing strategy. Environ Microbiol. 2019;21:4548–62.
- 696 45. Lokmer A, Wegner KM. Hemolymph microbiome of Pacific oysters in response to temperature,  
697 temperature stress and infection. The ISME journal. 2015;9:670–82.
- 698 46. Rahman FU, Andree KB, Salas-Massó N, Fernandez-Tejedor M, Sanjuan A, Figueras MJ, et al.  
699 Improved culture enrichment broth for isolation of *Arcobacter*-like species from the marine  
700 environment. Sci Rep. 2020;10:14547.
- 701 47. Yost S, Duran-Pinedo AE, Teles R, Krishnan K, Frias-Lopez J. Functional signatures of oral  
702 dysbiosis during periodontitis progression revealed by microbial metatranscriptome analysis. Genome  
703 Med. 2015;7:27.
- 704 48. Lamont RJ, Hajishengallis G. Polymicrobial synergy and dysbiosis in inflammatory disease.  
705 Trends in Molecular Medicine. 2015;21:172–83.
- 706 49. Heintz-Buschart A, Wilmes P. Human gut microbiome: function matters. Trends in Microbiology.  
707 2018;26:563–74.
- 708 50. Murray JL, Connell JL, Stacy A, Turner KH, Whiteley M. Mechanisms of synergy in  
709 polymicrobial infections. J Microbiol. 2014;52:188–99.
- 710 51. Lami R, Ghiglione J, Desdevises Y, West NJ, Lebaron P. Annual patterns of presence and activity  
711 of marine bacteria monitored by 16S rDNA–16S rRNA fingerprints in the coastal NW Mediterranean  
712 Sea. Aquatic Microbial Ecology. 2009;54:199–210.
- 713 52. Wu D, Daugherty SC, Van Aken SE, Pai GH, Watkins KL, Khouri H, et al. Metabolic  
714 complementarity and genomics of the dual bacterial symbiosis of sharpshooters. Parkhill J, editor.  
715 PLoS Biol. 2006;4:e188.
- 716 53. Leray M, Meyer CP, Mills SC. Metabarcoding dietary analysis of coral dwelling predatory fish  
717 demonstrates the minor contribution of coral mutualists to their highly partitioned, generalist diet.  
718 PeerJ. 2015;3:e1047.
- 719 54. Lucas A, Bodger O, Brosi BJ, Ford CR, Forman DW, Greig C, et al. Floral resource partitioning  
720 by individuals within generalised hoverfly pollination networks revealed by DNA metabarcoding. Sci  
721 Rep. 2018;8:5133.
- 722 55. Brochet S, Quinn A, Mars RA, Neuschwander N, Sauer U, Engel P. Niche partitioning facilitates  
723 coexistence of closely related honey bee gut bacteria. eLife. 2021;10:e68583.
- 724



725 **Legends of figures**

726 **Figure 1. Kaplan-Meier survival curves of oyster biparental families confronted with two**  
727 **different infectious environments.** Resistant oyster families ( $R_{F21}$ ,  $R_{F23}$ , and  $R_{F48}$ ) are presented in  
728 green, and susceptible oyster families ( $S_{F11}$ ,  $S_{F14}$ , and  $S_{F15}$ ) are presented in red. At each time point  
729 (indicated by asterisks on the arrow), 10 oysters were sampled 3 triplicates from each family in each  
730 tank for barcoding, qPCR, and metatranscriptomic analysis. For metatranscriptomic analysis oysters  
731 were sampled at the onset of mortalities (60h and 72h post-exposure for Atlantic and Mediterranean  
732 infectious environments, respectively). Data for the Atlantic infectious environment was extracted  
733 from [21] and shown for comparison.

734 **Figure 2. Primary OsHV-1 infection, bacterial dysbiosis, and secondary bacteremia are**  
735 **conserved in different infectious environments. (a)** Early and intense replication of OsHV-1  $\mu$ Var  
736 occurs in susceptible oysters (red), but not resistant oysters (green), confronted with either the Atlantic  
737 or the Mediterranean infectious environment. OsHV-1 load was quantified by qPCR and expressed as  
738 Viral Genomic Units per ng of oyster DNA (log scale) during experimental infections. Asterisks  
739 indicate significant differences between susceptible and resistant oyster families (Mann Whitney test,  
740  $p < 0.05$ ). **(b-c)** Principal coordinate analysis (PCoA) plot of the microbiota for susceptible (red) and  
741 resistant (green) oyster families confronted with each infectious environment. Dispersion of oyster  
742 families according to the Bray-Curtis dissimilarity matrix (beta diversity) in **(b)** Atlantic and **(c)**  
743 Mediterranean infectious environments. **(d)** Temporal dynamics of total bacteria in susceptible (red)  
744 and resistant (green) oyster families confronted with two different infectious environments. Total  
745 bacterial quantification based on qPCR amplification of the V3-V4 region of the 16S rRNA gene  
746 during experimental infections. Asterisks indicate significant differences between susceptible and  
747 resistant oyster families (Mann Whitney test,  $p < 0.05$ ). Data from the Atlantic infectious environment  
748 in panels (a) and (d) are extracted from [21] for comparison.

749 **Figure 3. Heatmaps of bacterial genera that changed significantly in abundance over the course**  
750 **of infection in susceptible oysters ( $S_{F11}$ ,  $S_{F14}$ , and  $S_{F15}$ ) in the Atlantic and Mediterranean**  
751 **infectious environments.** Analyses were performed at the genus level. Only genera that changed  
752 significantly in abundance and had a relative proportion greater than 2% in at least one sample are  
753 shown. Increased intensity of color (blue) represents increased relative abundance. Genera that are  
754 consistently modified in 5 out of the 6 conditions (3 families and 2 infectious environments) are in red.

755 **Figure 4. Heatmap of transcriptional activity of bacterial genera in susceptible oyster families**  
756 **( $S_{F11}$ ,  $S_{F14}$ , and  $S_{F15}$ ) in the two infectious environments at the time of exposure to the infectious**  
757 **environment and in diseased oysters.** For each condition, results of the three replicates are shown.  
758 Increased color intensity (blue) indicates increased relative activity of the genus. Genera shown  
759 contributed at least 2% of the total transcriptional activity in at least one sample of diseased oysters.  
760 Bacterial genera that were overrepresented according to metatranscriptomics alone for all conditions in  
761 the diseased oysters are in red, while genera that were overrepresented according to both

762 metabarcoding and metatranscriptomics are underscored (Atl: Atlantic, Med: Mediterranean, T0: time  
763 of exposure to the infectious environment, T60/72: diseased).

764 **Figure 5. Heatmap of bacterial gene expression variation for each 31 functional categories**  
765 **between T0 and the onset of oyster mortality.** Graded colors (blue to red from decreases to  
766 increases) are used to represent the extent of the global changes of each category, using a log 2 scale.  
767 White cells indicate categories with no gene expression in a given genus (gene absent or expression  
768 not detected).

769 **Figure 6. Increased expression pathways of the pathobiota metabolism between T0 and the onset**  
770 **of oyster mortality and the contribution of each bacterial genus.** EC numbers of differentially  
771 overexpressed genes involved in bacterial metabolism (**Supplementary Table 8**) were mapped on  
772 KEGG metabolic map 01120 (Microbial metabolism in diverse environments,  
773 [https://www.kegg.jp/kegg-bin/show\\_pathway?ec01120](https://www.kegg.jp/kegg-bin/show_pathway?ec01120)) using a color code for each genus. The  
774 highlighted pathways are labelled. Pathways common to two genera or more are in black. Red arrows  
775 indicate the pathway corresponding to neoglucogenesis. Note that not all relevant pathways are  
776 represented on this map (such as oxidative phosphorylation) which was chosen for the sake of clarity.

777

778 **Supplementary data**

779 **Supplementary Figure 1. Steps of metatranscriptomic analyses.**

780 **Supplementary Figure 2. Microbiota modification as analysed using 16S rRNA metabarcoding**  
781 **in susceptible and resistant oyster families confronted with two different infectious**  
782 **environments.** Susceptible oyster families ( $S_{F11}$ ,  $S_{F14}$  and  $S_{F15}$ ) and resistant oyster families ( $R_{F21}$ ,  $R_{F23}$   
783 and  $R_{F48}$ ) confronted with (a) Atlantic or (b) Mediterranean infectious environments. Significant  
784 changes in abundance (up or down; DESeq2, FDR < 0.05) between the initial and the final time point  
785 of the infection were much greater for each taxonomic rank (from the phylum to the OTU rank) for  
786 susceptible oyster families than for resistant oyster families. Data for  $AS_{F11}$  and  $AR_{F21}$  were extracted  
787 from [21].

788 **Supplementary Figure 3. Heatmaps of bacterial genera that changed significantly in abundance**  
789 **over the course of infection in resistant oysters ( $R_{F11}$ ,  $R_{F14}$ ,  $R_{F15}$ ) in the Atlantic and**  
790 **Mediterranean infectious environments.** Analyses were performed at the genus level. Only genera  
791 with a relative proportion greater than 2% in at least one sample are shown. Increased color intensity  
792 (blue) indicates increased relative abundance of the genus.

793 **Supplementary Figure 4. Number of significant over- and underexpressed genes in each genus**  
794 **and each infectious environment.**

795 **Supplementary Figure 5. Enrichment analysis of significant overexpressed bacterial genes in the**  
796 **31 functional categories.** Graded colors (blue to red) are used to represent the observed over expected  
797 values (Fisher's exact tests), and indicate under- to overrepresentation, respectively. Grey cells

798 indicate not significant categories.

799 **Supplementary Figure 6. Enrichment analysis of significant overexpressed bacterial genes**  
800 **within the functional category of translation.** Graded colors (blue to red) are used to represent the  
801 observed over expected values (Fisher's exact tests), and indicate under- to overrepresentation,  
802 respectively. Grey cells indicate not significant subcategories.

803 **Supplementary Figure 7. Enrichment analysis of significant overexpressed bacterial genes**  
804 **within the functional category of central metabolism.** Graded colors (blue to red) are used to  
805 represent the observed over expected values (Fisher's exact tests), and indicate under- to  
806 overrepresentation, respectively. Grey cells indicate not significant subcategories.

807 **Supplementary Figure 8. Decreased expression pathways of the pathobiota metabolism between**  
808 **T0 and the onset of oyster mortality and the contribution of each bacterial genus.** EC numbers of  
809 differentially underexpressed genes involved in bacterial metabolism (**Supplementary Table 8**) were  
810 mapped on KEGG metabolic map 01120 (Microbial metabolism in diverse environments,  
811 [https://www.kegg.jp/kegg-bin/show\\_pathway?ec01120](https://www.kegg.jp/kegg-bin/show_pathway?ec01120)) using a color code for each genus. The  
812 highlighted pathways are labelled. Pathways common to two genera or more are in black. Red arrows  
813 indicate the pathway corresponding to neoglucogenesis. Note that not all relevant pathways are  
814 represented on this map (such as oxidative phosphorylation) which was chosen for the sake of clarity.  
815

816 **Supplementary Table 1. Total raw reads (R1+R2) at each stage of biocomputing, after**  
817 **sequencing and removal of rRNA reads (eukaryotic and bacterial), oyster reads, and viral reads.**

818 **Supplementary Table 2. List of functional categories defined for bacterial metatranscriptomics.**

819 **Supplementary Table 3. Absolute abundance of bacteria and their corresponding taxonomic**  
820 **affiliations in susceptible and resistant oyster families confronted with two different infectious**  
821 **environments.** Susceptible oyster families are  $S_{F11}$ ,  $S_{F14}$ , and  $S_{F15}$ ; resistant oyster families are  $R_{F21}$ ,  
822  $R_{F23}$ , and  $R_{F48}$ . A indicates the Atlantic infectious environment, M the Mediterranean infectious  
823 environment. T0, T6, T12, T24, T48, T60, and T72 indicate sampling times (in hours) over the course  
824 of experimental infection. R1, R2, R3 indicate the results of each replicate. This large table is available  
825 at <https://osf.io/kybva/>.

826 **Supplementary Table 4. Frequencies of bacterial taxa that change significantly in abundance**  
827 **over the course of each experimental infection (Atlantic or Mediterranean) in susceptible and**  
828 **resistant oyster families.** The change in abundance of bacterial taxa between initial and final time  
829 points was determined using DEseq2 with the FDR < 0.05. Susceptible oyster families are  $S_{F11}$ ,  $S_{F14}$ ,  
830 and  $S_{F15}$ ; resistant oyster families are  $R_{F21}$ ,  $R_{F23}$ , and  $R_{F48}$ . A indicates the Atlantic infectious  
831 environment, M the Mediterranean infectious environment. T0, T6, T12, T24, T48, T60 and T72

832 indicate sampling times (in hours) over the course of experimental infection. R1, R2, R3 indicate the  
833 results of each replicate.

834 **Supplementary Table 5. Contigs identified from the seven main bacterial genera.** Annotations  
835 and expression values in TPM are indicated. This large table is available at <https://osf.io/kybva/>.

836 **Supplementary Table 6. Encoded proteins of the seven main bacterial genera.** Values correspond  
837 to normalized expression for each condition (TPM+1/total number of TPM in the genus) to correct for  
838 different amount of the genus in different samples (reflected by different total TPM for the genus in  
839 different samples). Expression ratio (ER) correspond to the average of normalized expression of 9  
840 samples at T60/72 divided by average of normalized expression of 9 samples at T0). NT: not tested if  
841 genes have less than three values for a condition in **Supplementary Table 5**. This large table is  
842 available at <https://osf.io/kybva/>.

843 **Supplementary Table 7. Encoded functions of the seven main bacterial genera.** Values correspond  
844 to normalized expression for each condition (sum of expressions for genes coding for a same  
845 function), Expression ratio (ER) correspond to the average of normalized expression of 9 samples at  
846 T60/72 divided by average of normalized expression of 9 samples at T0). NT: not tested if functions  
847 have less than three values for a condition in **Supplementary Table 5**.

848 **Supplementary Table 8. Transcriptomic changes of functions involved in central and energy  
849 metabolism for the different bacterial genera between T0 and the onset of oyster mortality.**  
850 Values correspond to log<sub>2</sub> (ER). NS: not significant. Based on quantitative data presented in  
851 **Supplementary Table 7**.

852 **Supplementary Table 9. Differentially expressed functions in the seven bacterial genera from  
853 selected categories potentially important for successful colonization (adhesion, cell defense,  
854 metal homeostasis, redox homeostasis and oxidative stress response, stress response, and  
855 virulence/ fitness).** Based on quantitative data presented in **Supplementary Table 7**.

856

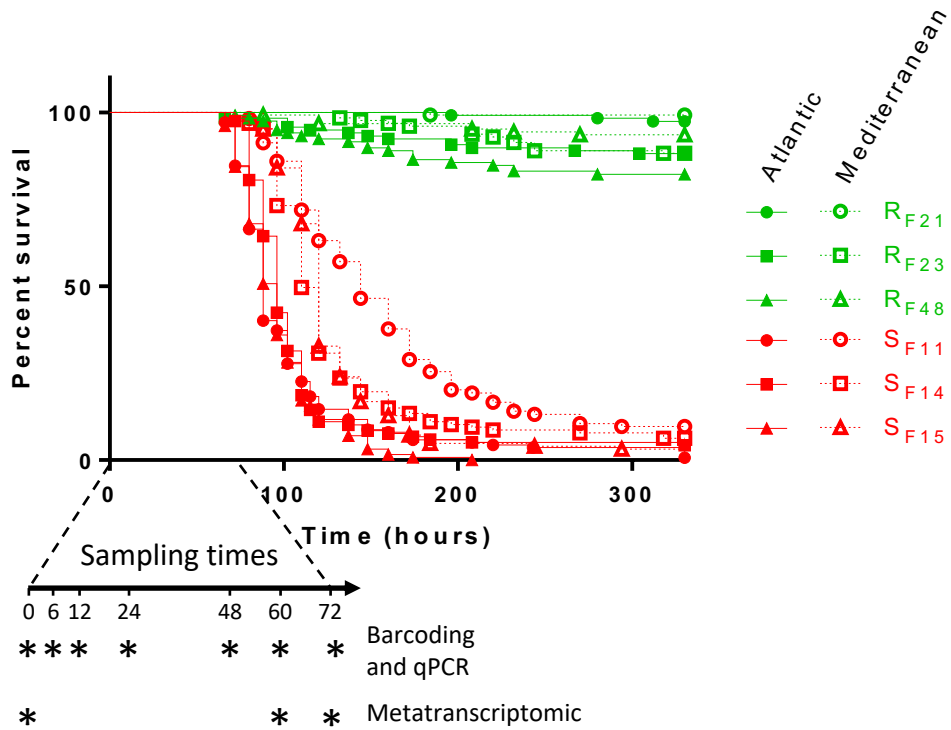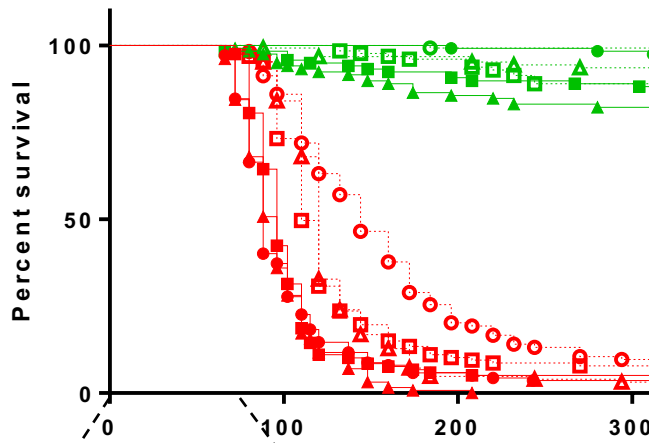

Barcoding and qPCR

Metatranscriptomic

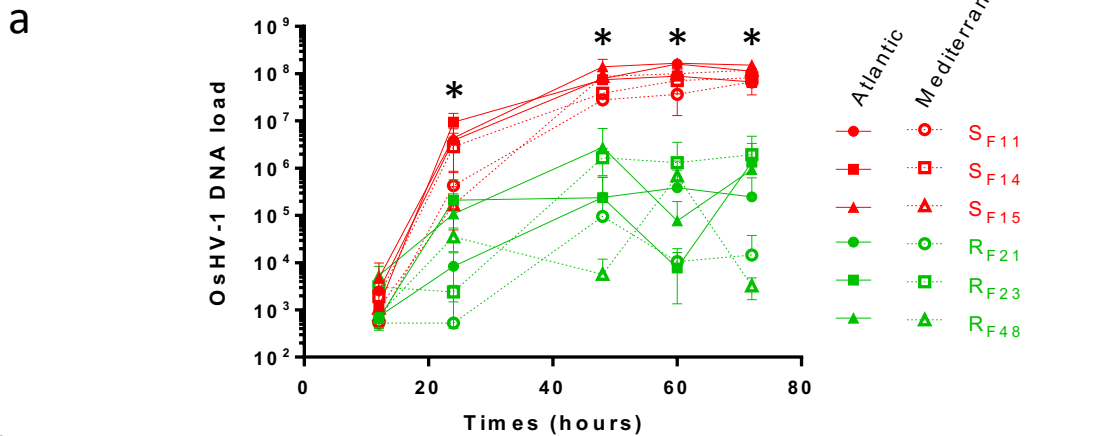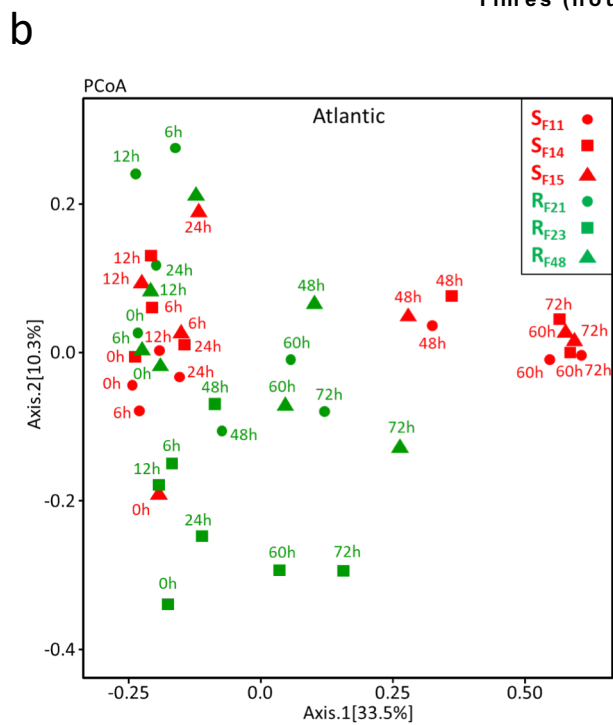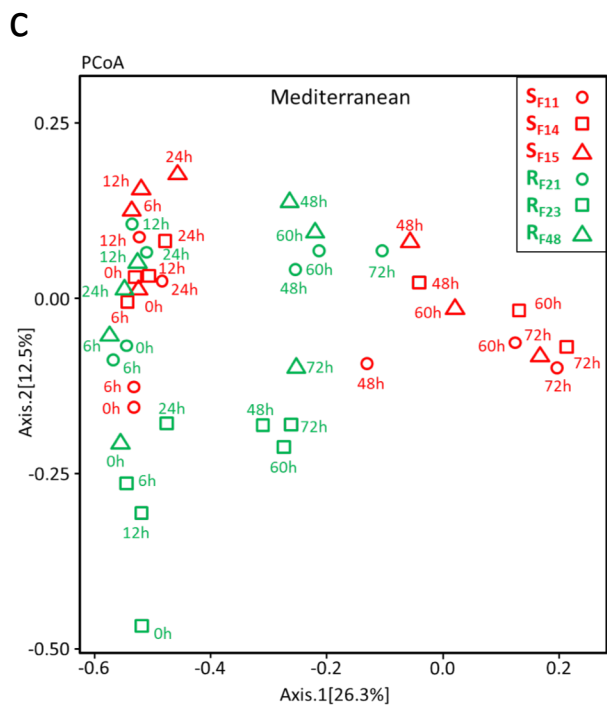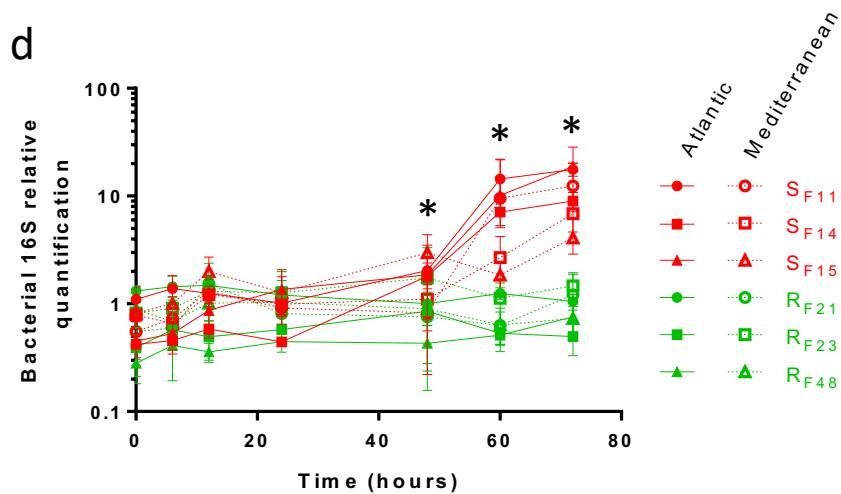

# Atlantic

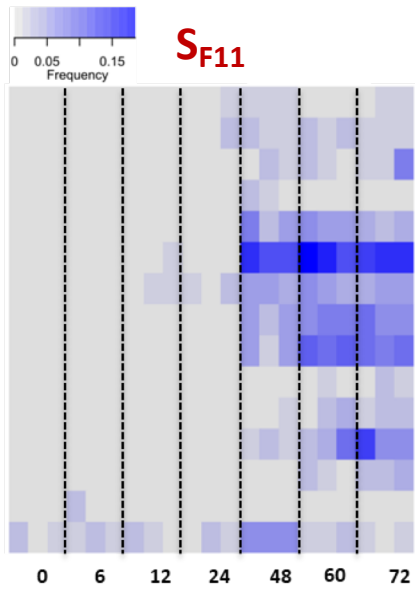

*Prolixibacter*  
*Pseudoalteromonas*  
*Psychrilyobacter*  
*Neptuniibacter*  
*Marinomonas*  
*Arcobacter*  
*Vibrio*  
*Marinobacterium*  
*Psychrobium*  
*Aureivirga*  
*Cryomorphaceae*  
*Salinirepens*  
*Fusibacter*  
*Mycoplasma*  
*Psychromonas*

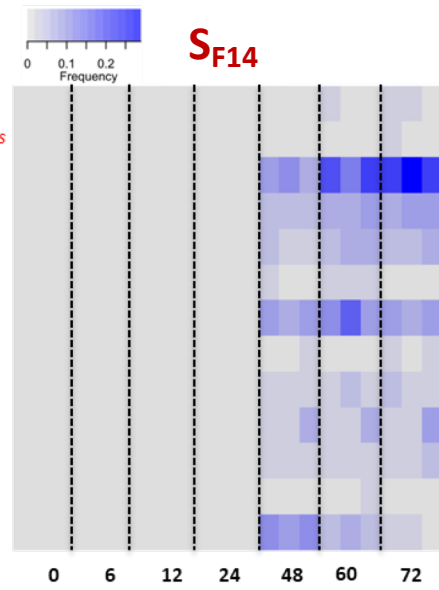

*Fusibacter*  
*Aureivirga*  
*Salinirepens*  
*Marinobacterium*  
*Marinomonas*  
*Pseudoalteromonas*  
*Arcobacter*  
*Prolixibacter*  
*Psychrobium*  
*Psychrilyobacter*  
*Vibrio*  
*Cryomorphaceae*  
*Psychromonas*

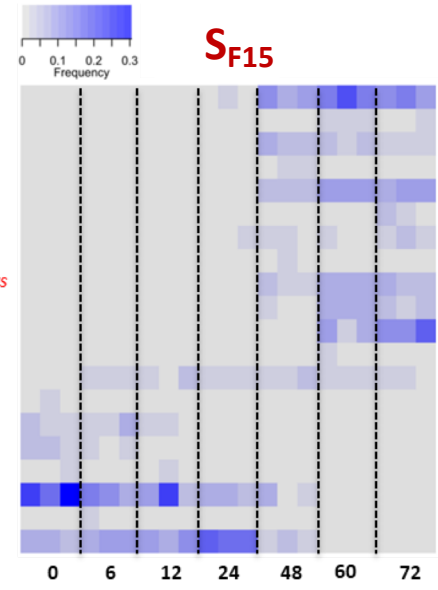

*Arcobacter*  
*Pseudoalteromonas*  
*Psychromonas*  
*Neptuniibacter*  
*Marinobacterium*  
*Fusibacter*  
*Psychrilyobacter*  
*Prolixibacter*  
*Marinomonas*  
*Psychrobium*  
*Salinirepens*  
*Aquibacter*  
*Vibrio*  
*Candidatus*  
*Fluviicola*  
*Planctomyces*  
*Kiloniella*  
*Aquimarina*  
*Rhodopirellula*  
*Oleiphilus*

# Mediterranean

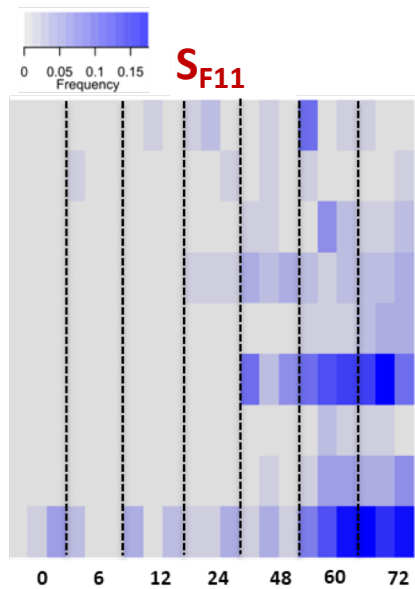

*Pseudofulvibacter*  
*Psychrilyobacter*  
*Marinomonas*  
*Prolixibacter*  
*Fusibacter*  
*Arcobacter*  
*Cryomorphaceae*  
*Marinobacterium*  
*Aquibacter*

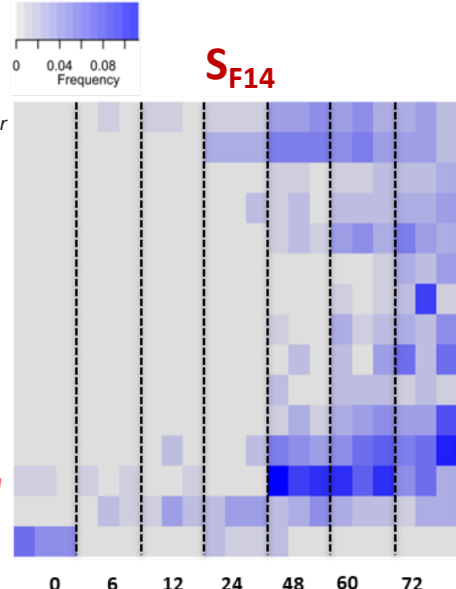

*Psychrilyobacter*  
*Prolixibacter*  
*Amphritea*  
*Pseudoalteromonas*  
*Bdellovibrionaceae*  
*Psychrobium*  
*Propionigenium*  
*Cryomorphaceae*  
*Marinomonas*  
*Litoribacillus*  
*Marinobacterium*  
*Arcobacter*  
*Psychromonas*  
*Vibrio*  
*Peredibacter*

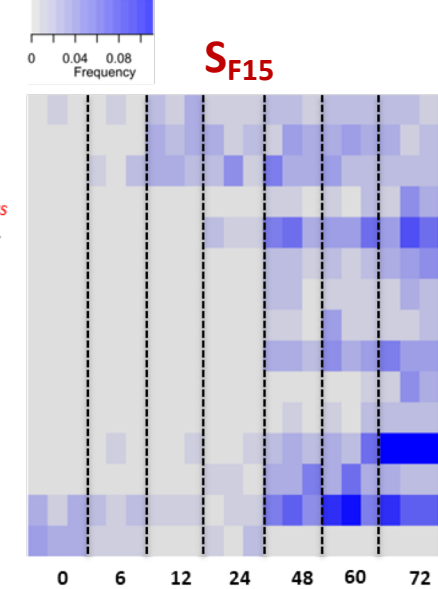

*Pseudofulvibacter*  
*Psychrilyobacter*  
*Vibrio*  
*Marinomonas*  
*Arcobacter*  
*Phaebacter*  
*Pseudoalteromonas*  
*Litoribacillus*  
*Marinobacterium*  
*Psychrobium*  
*Cryomorphaceae*  
*Aquibacter*  
*Prolixibacter*  
*Psychromonas*  
*Peredibacter*

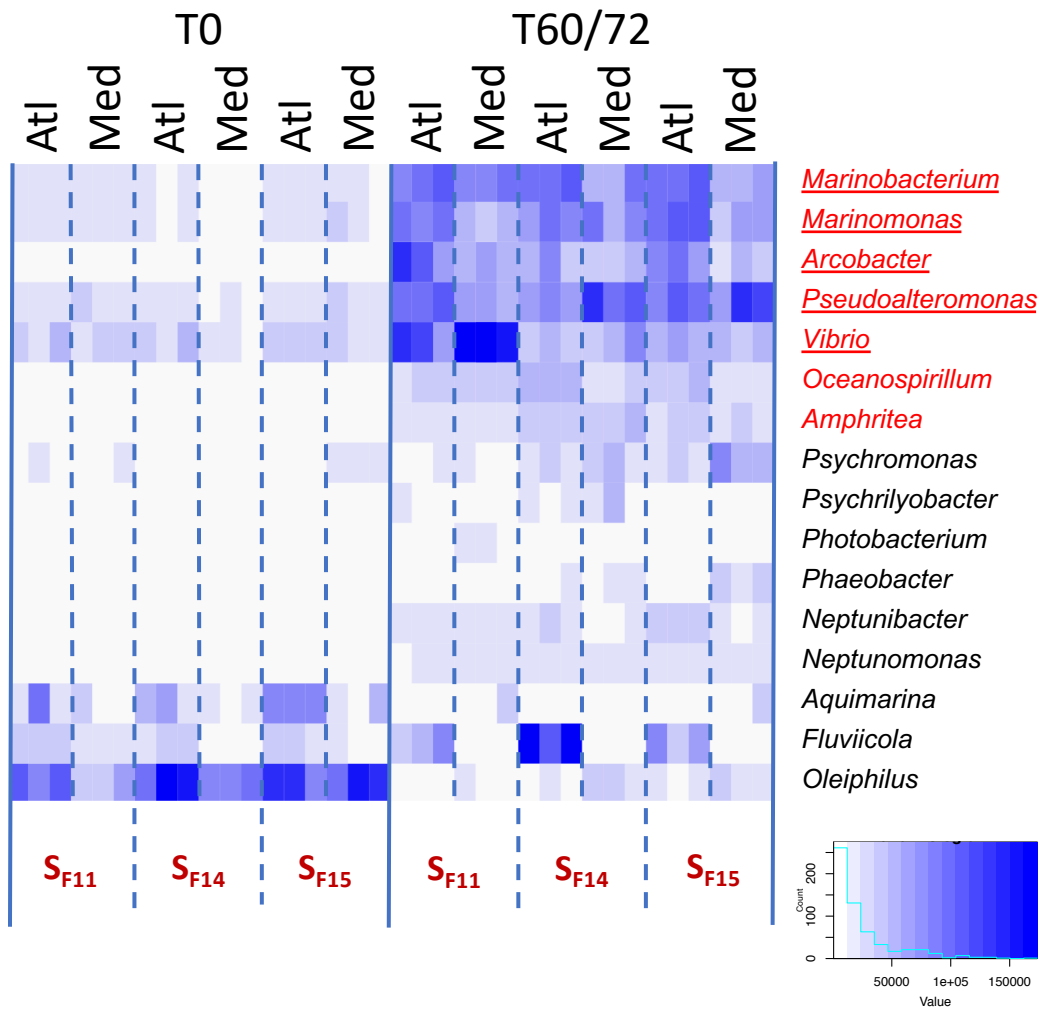



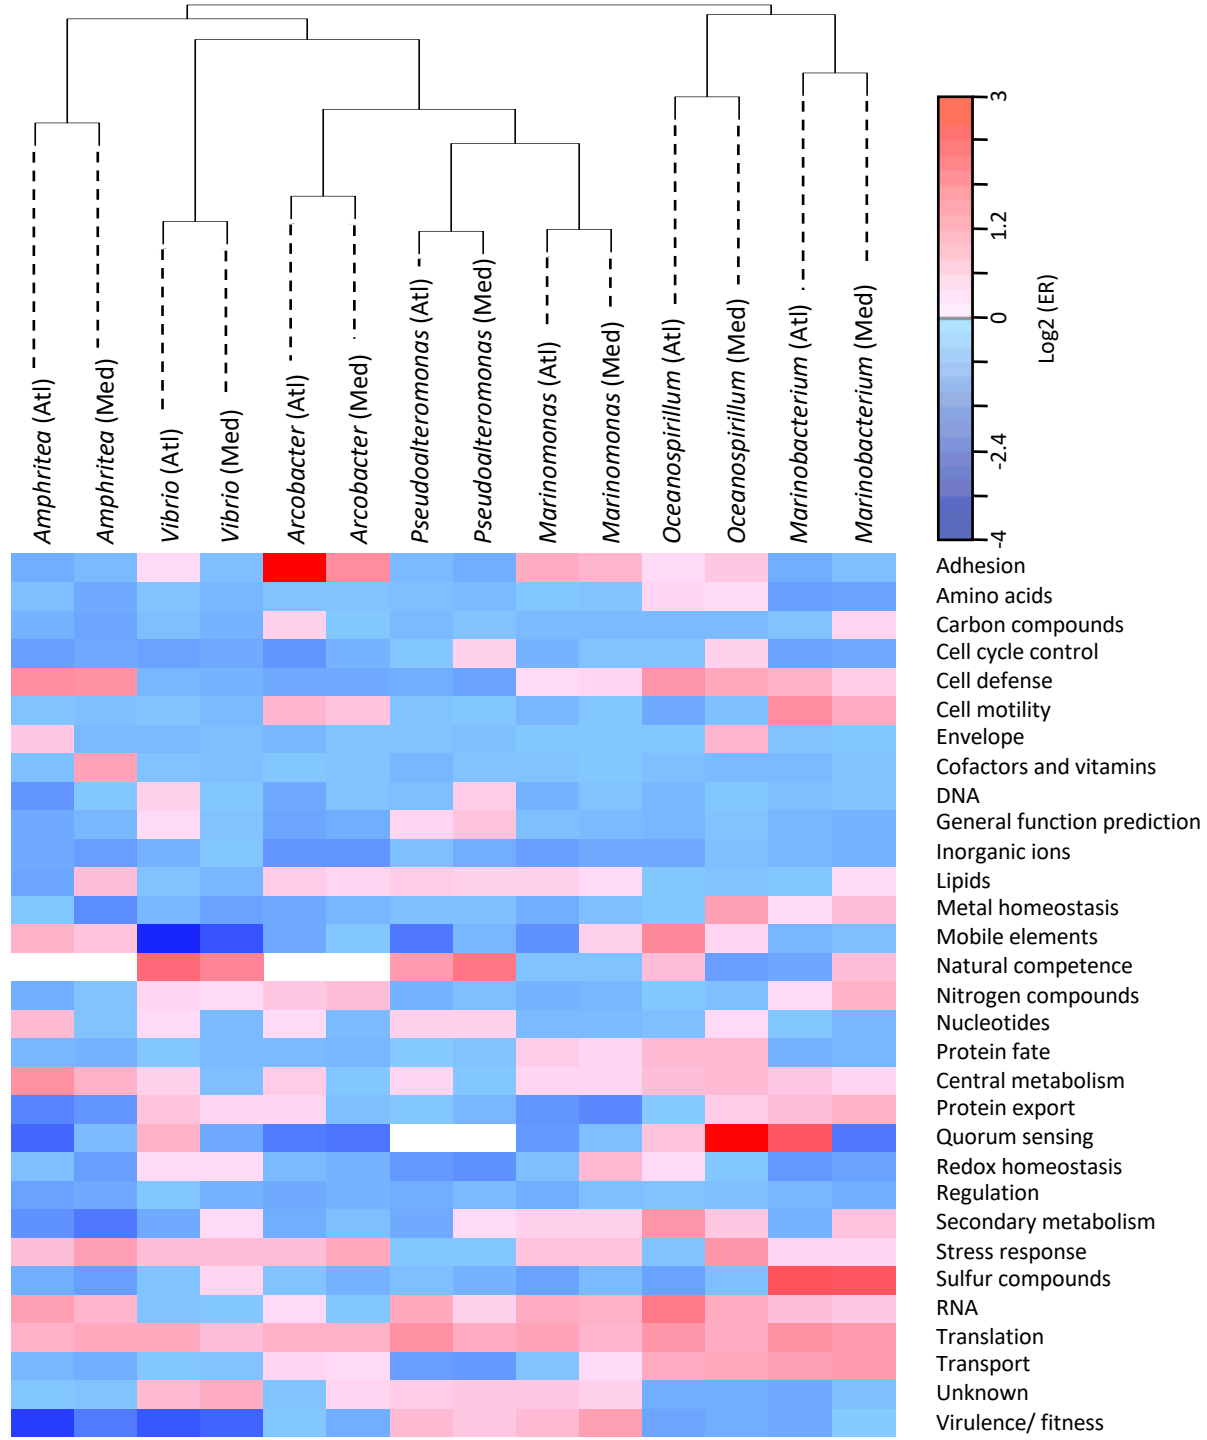

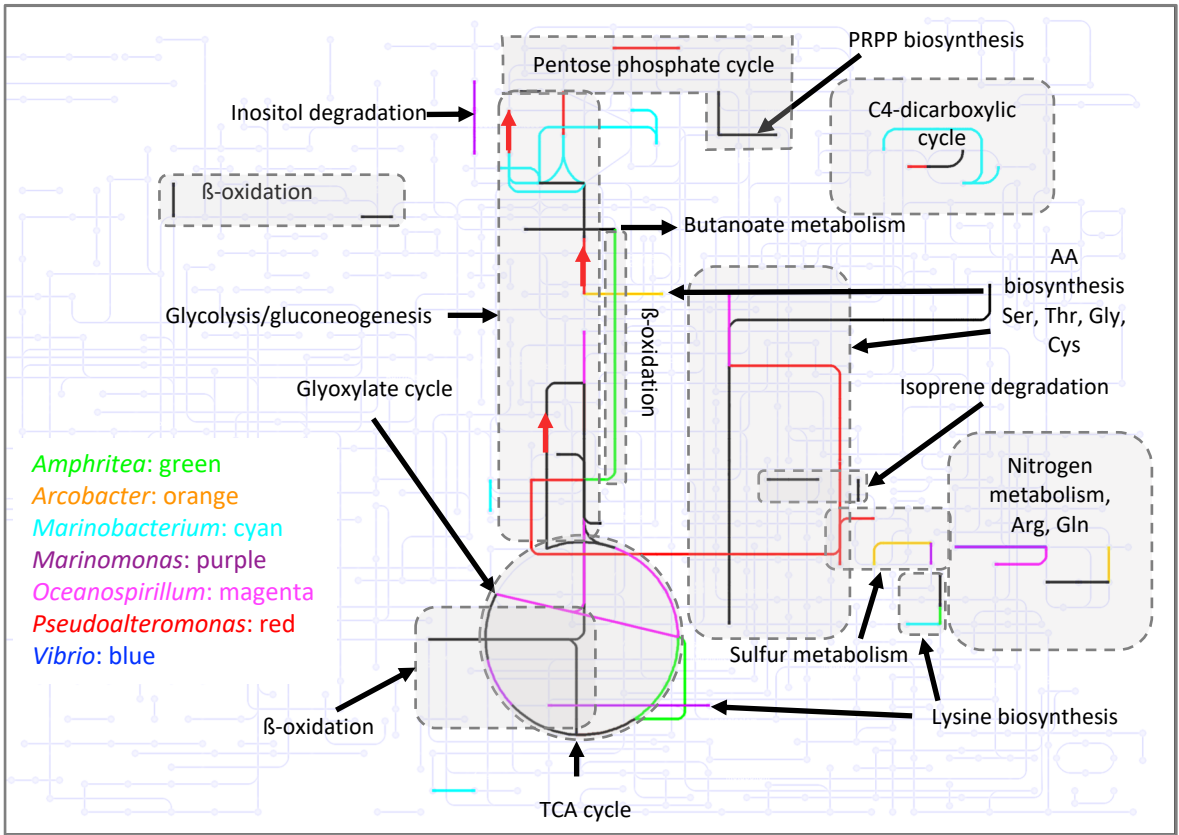

Source: https://www.biorxiv.org/content/10.1101/2020.11.16.384644v2.full.pdf
